# Supplementary material for: Improvement of Inflammation and Pain after Three Months’ Exclusion Diet in Rheumatoid Arthritis Patients
Source: MDPI journal article supplement (doi:10.3390/nu13103535), 2021-10-09
Supplement: s1 [file s1]

**Supplemental Table S1:** Macronutrients (daily intake)

|                                  | <b>PRIVATIVE<br/>DIET</b> | <b>BALANCED<br/>DIET</b> |
|----------------------------------|---------------------------|--------------------------|
| <b>CARBOHYDRATES</b>             | <b>56%</b>                | <b>56%</b>               |
| <b>TOTAL PROTEINS</b>            | <b>16%</b>                | <b>17%</b>               |
| Fish proteins                    | 50,1 %                    | ---                      |
| Meat proteins                    | ---                       | 28,8%                    |
| Milk product proteins            | ---                       | 7,1%                     |
| Animal proteins & Flour products | 16,1%                     | 31,1%                    |
| Legumes proteins                 | 19,3%                     | 15,7%                    |
| Fruit & Vegetable proteins       | 14,5%                     | 17,3%                    |
| <b>LIPIDS</b>                    | <b>28%</b>                | <b>27%</b>               |

**Supplemental Table S2:** Privative diet (deprived of meat, gluten and lactose) (1500 Kcalories)

|                                                                                                                                               |
|-----------------------------------------------------------------------------------------------------------------------------------------------|
| <b>Breakfast:</b>                                                                                                                             |
| Thé 200 g                                                                                                                                     |
| Biscuits - (Bi-Aglut) 40 g                                                                                                                    |
| <b>Morning snack:</b>                                                                                                                         |
| Bananas 150 g                                                                                                                                 |
| Dark chocolate 10 g                                                                                                                           |
| <b>Lunch:</b>                                                                                                                                 |
| Paste - (Glutafin) 70 g                                                                                                                       |
| Dried legumes 40 g                                                                                                                            |
| Vegetables 200 g                                                                                                                              |
| Extra virgin olive oil 10 g                                                                                                                   |
| <b>Snack:</b>                                                                                                                                 |
| Pears 200 g                                                                                                                                   |
| <b>Dinner:</b>                                                                                                                                |
| Fresh cod or hake 180 g (or Sea bream fillets 110 g) (or Plaice or flounder 160 g) (or Fresh salmon 70 g) (or Sole 150 g) (or Sea bass 160 g) |
| Mixed salad 100 g                                                                                                                             |
| Carrots 100 g                                                                                                                                 |
| Gluten-free bread 100 g                                                                                                                       |
| Extra virgin olive oil 20 g                                                                                                                   |

### Supplemental Table S3 – Balanced diet (1500 Kcalories)

---

**Breakfast:**

---

Partially skimmed pasteurized cow's milk 150 g  
Wholemeal biscuits 40 g

---

**Morning snack:**

---

Oranges 150 g

---

**Lunch:**

---

Semolina pasta 80 g  
Canned borlotti beans 120 g  
Vegetables 100 g  
Extra virgin olive oil 10 g

---

**Snack:**

---

Apples 150 g  
Dark chocolate 10 g

---

**Dinner:**

---

Whole skinless chicken 120g (or chicken breast 130g) (or turkey breast 120g) (or turkey leg 110g)  
Vegetables 200 g  
Wholemeal bread 100 g  
Extra virgin olive oil 15 g

---
